# Supplementary material for: Doping Fe at the Co-tetrahedra site to improve the microstructure, optical, and Na-ion migrations in Na2Co1−xFexSiO4
Source: Royal Society of Chemistry journal article supplement (doi:10.1039/d3nj02031b), 2023-01-01
Supplement: d3nj02031b1.pdf [file d3nj02031b1.pdf]

**Doping Fe at the Co-tetrahedra site to improve the microstructure, optical,  
and Na-ion migrations in  $\text{Na}_2\text{Co}_{1-x}\text{Fe}_x\text{SiO}_4$**

**Kawthar Trabelsi <sup>a,\*</sup>, Karim Karoui <sup>a</sup>, Abdelfattah Mahmoud <sup>b</sup>, Frédéric Boschini <sup>b</sup> and  
Abdallah Ben Rhaïem <sup>a</sup>**

<sup>a</sup> Laboratory LaSCOM, University of Sfax, BP1171, 3000, Sfax, Tunisia

<sup>b</sup> GREENMAT, CESAM, Institute of Chemistry B6, University of Liège, 4000 Liège, Belgium

\*Corresponding author: [trabelsikaouther36@gmail.com](mailto:trabelsikaouther36@gmail.com)

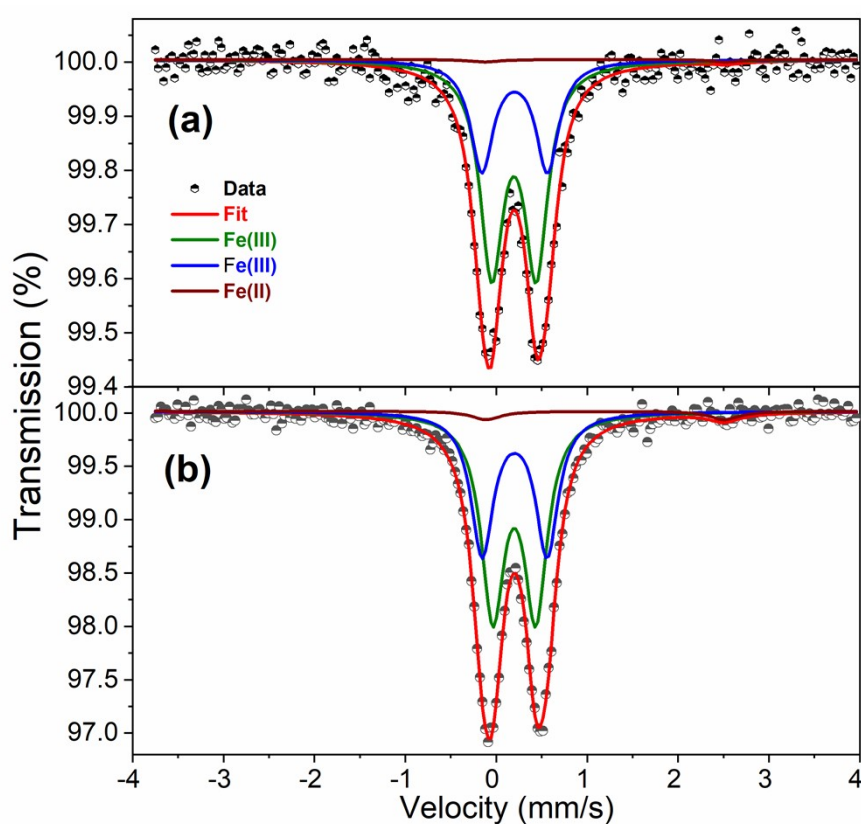

Fig.1S. The Mössbauer spectra recorded at room temperature of a)  $\text{Na}_2\text{Co}_{0.9}\text{Fe}_{0.1}\text{SiO}_4$  and (b)  $\text{Na}_2\text{Co}_{0.8}\text{Fe}_{0.2}\text{SiO}_4$ .

Table 1S Fractional atom coordinates and isotopic atomic displacement parameters ( $\text{\AA}^2$ ) for  $\text{Na}_2\text{Co}_{1-x}\text{Fe}_x\text{SiO}_4$ , with  $x=0.1$  and  $0.2$  from x-ray powder diffraction data at 300 K.

| Samples | Atom  | x          | y          | z          | $O_{cc}$ | $U_{iso}$ ( $\text{\AA}^2$ ) |
|---------|-------|------------|------------|------------|----------|------------------------------|
|         | Co    | 0.1448(8)  | 0.2744(2)  | 0.6139(9)  | 0.89954  | 0.115(8)                     |
|         | Fe    | 0.1448(8)  | 0.2744(2)  | 0.6140(10) | 0.098    | 0.115(8)                     |
|         | Si    | 0.4050(10) | 0.2670(10) | 0.8760(1)  | 1        | -0.031(7)                    |
|         | Na(1) | 0.1248(1)  | 0.2540(8)  | 0.0741(7)  |          | -0.035(1)                    |

|       |           |            |            |            |           |            |
|-------|-----------|------------|------------|------------|-----------|------------|
| NCFS1 | Na(2)     | 0.3909(8)  | 0.2819(3)  | 0.3661(10) |           | -0.001(6)  |
|       | O(1)      | 0.3202(1)  | 0.3882(3)  | 0.7057(3)  |           | 0.112(4)   |
|       | O(2)      | 0.1000(1)  | 0.4470(1)  | 0.4080(10) |           | 0.001(2)   |
|       | O(3)      | 0.0510(1)  | 0.2890(1)  | 0.8940(10) |           | 0.186(8)   |
|       | O(4)      | 0.1420(2)  | 0.8800(3)  | 0.5757(1)  |           | -0.085(3)  |
| NCFS2 | Co        | 0.1527(1)  | 0.2580(3)  | 0.6370(1)  | 0.79748   | 0.012(6)   |
|       | Fe        | 0.1527(1)  | 0.2580(3)  | 0.6370(1)  | 0.1999    | 0.012(6)   |
|       | Si        | 0.4050(10) | 0.2670(9)  | 0.8760(4)  | 1         | -0.028(2)  |
|       | Na(1)     | 0.1669(8)  | 0.2540(8)  | 0.0741(7)  |           | -0.041(8)  |
|       | Na(2)     | 0.4070(2)  | 0.2819(3)  | 0.3646(1)  |           | -0.001(10) |
|       | O(1)      | 0.3220(2)  | 0.4020(10) | 0.7057(3)  |           | 0.122(5)   |
|       | O(2)      | 0.1000(10) | 0.4470(7)  | 0.4080(10) |           | 0.001(2)   |
|       | O(3)      | 0.051(2)   | 0.2830(5)  | 0.8840(10) |           | 0.185(5)   |
| O(4)  | 0.1420(7) | 0.880(3)   | 0.5770(9)  |            | -0.085(2) |            |

Table 2S: Selected distances of NCFS1 and NCFS2 (Å)

|          | NCFS1       | NCFS2       |
|----------|-------------|-------------|
| Co/Fe–O1 | 2.970       | 1.885       |
| Co/Fe–O2 | 3.749       | 2.931       |
| Co/Fe–O3 | 1.946       | 3.976       |
| Co/Fe–O4 | 3.431       | 3.314       |
| Si– O1   | 2.707       | 3.210       |
| Si– O2   | 1.785       | 1.884       |
| Si– O3   | 2.102       | 2.211       |
| Si– O4   | 2.870       | 2.912       |
| Na1– O1  | 2.759-3.604 | 2.789-3.712 |
| Na1– O2  | 2.801-3.599 | 2.811-3.727 |
| Na1– O3  | 2.178-3.995 | 2.188-4.205 |
| Na1– O4  | 2.115-4.222 | 2.225-4.284 |
| Na2– O1  | 2.793-4.004 | 2.793-4.231 |
| Na2– O1  | 2.202-4.236 | 2.402-4.076 |
| Na2– O1  | 2.640-4.462 | 2.669-4.462 |
| Na2– O1  | 2.464-4.048 | 2.475-4.033 |

Table 3S: Selected angles of NCFS1 and NCFS2 (°)

|               | NCFS1  | NCFS2  |
|---------------|--------|--------|
| O4–Co–O1      | 116.08 | 93.54  |
| O1–Co/Fe–O2   | 112.06 | 118.39 |
| O1–Co/Fe–O3   | 91.90  | 105.14 |
| O4– Co/Fe –O2 | 91.16  | 104.75 |
| O4– Co/Fe –O3 | 116.50 | 103.34 |
| O2– Co/Fe –O3 | 129.05 | 125.62 |

---

|           |        |        |
|-----------|--------|--------|
| O3-Si-O1  | 124.15 | 122.03 |
| O3-Si-O2  | 129.76 | 81.65  |
| O3-Si-O4  | 117.76 | 107.4  |
| O1-Si-O2  | 117.82 | 91.71  |
| O1-Si-O4  | 79.52  | 125.20 |
| O2-Si-O4  | 114.55 | 101.55 |
| O3-Na1-O4 | 116.54 | 113.95 |
| O3-Na2-O1 | 125.96 | 98.75  |
| O2-Na2-O4 | 118.84 | 116.28 |

---
